# Supplementary material for: Microdamage analysis of single-use flexible ureteroscope immediately after lithotripsy use
Source: PubMed Central journal article supplement (PMC9626578; doi:10.1038/s41598-022-23345-z), 2022-11-01
Supplement: 41598_2022_23345_MOESM1_ESM.pdf [file 41598_2022_23345_MOESM1_ESM.pdf]

**Microdamage analysis of single-use flexible ureteroscope immediately after lithotripsy use**

Teruaki Sugino, Kazumi Taguchi, Rei Unno, Shuzo Hamamoto, Ryosuke Ando, Atsushi Okada, Takahiro Yasui

Supplementary Table S1. Detailed data on the scope deflection evaluation

| Operation type  | Ureterscopy      |                  | Supine ECIRS     |                  | Prone ECIRS      |                  |
|-----------------|------------------|------------------|------------------|------------------|------------------|------------------|
| Direction       | Up               | Down             | Up               | Down             | Up               | Down             |
| Pass criteria   | $\geq 275^\circ$ | $\geq 275^\circ$ | $\geq 275^\circ$ | $\geq 275^\circ$ | $\geq 275^\circ$ | $\geq 275^\circ$ |
| Scopes          | not applicable   | 282.8            | 298.9            | 299.8            | 300.7            | 299.4            |
|                 | 309.0            | 290.6            | 304.7            | 301.5            | 293.3            | 290.4            |
|                 | 287.5            | 293.5            | 301.8            | 305.6            | 263.0            | 284.1            |
|                 | 292.3            | 284.9            | 295.5            | 298.5            | 301.1            | 304.8            |
|                 | 202.8            | 261.6            | not applicable   | not applicable   | 300.3            | 302.7            |
|                 | 296.1            | 315.3            | 301.1            | 302.3            | 305.7            | 308.5            |
|                 | not applicable   | 284.8            | 302.2            | 296.9            | 298.6            | 281.8            |
|                 | 308.7            | 295.2            | 310.1            | 299.5            | 305.4            | 292.4            |
|                 | 300.9            | 295.0            | 297.5            | 297.3            | 299.4            | 303.2            |
|                 | 306.3            | 303.1            | 302.2            | 298.9            | 294.8            | 305.4            |
| Failure         | 3 (30%)          |                  | 1 (10%)          |                  | 1 (10%)          |                  |
| <i>P</i> -value | 0.574            |                  |                  |                  |                  |                  |

ECIRS, endoscopic combined intrarenal surgery.

Supplementary Table S2. Detailed data on the scope bending radius evaluation

| Operation type  | Uteteroscopy   |                | Supine ECIRS   |                | Prone ECIRS    |                |
|-----------------|----------------|----------------|----------------|----------------|----------------|----------------|
| Direction       | Up             | Down           | Up             | Down           | Up             | Down           |
| Pass criterion  | $8 \pm 0.5$ mm | $8 \pm 0.5$ mm | $8 \pm 0.5$ mm | $8 \pm 0.5$ mm | $8 \pm 0.5$ mm | $8 \pm 0.5$ mm |
| Scopes          | not applicable | 8.27           | 7.76           | 7.81           | 7.86           | 7.89           |
|                 | 7.96           | 8.44           | 7.73           | 8.06           | 7.80           | 7.94           |
|                 | 8.11           | 8.16           | 7.79           | 7.78           | 8.21           | 7.84           |
|                 | 8.41           | 8.32           | 7.71           | 7.82           | 7.68           | 7.68           |
|                 | 7.65           | 8.15           | not applicable | not applicable | 8.05           | 8.04           |
|                 | 7.75           | 7.99           | 7.69           | 7.87           | 7.62           | 7.79           |
|                 | not applicable | 7.96           | 8.02           | 8.11           | 7.59           | 7.68           |
|                 | 7.69           | 7.84           | 7.93           | 8.19           | 7.84           | 7.81           |
|                 | 7.86           | 7.84           | 7.83           | 7.92           | 7.78           | 7.74           |
|                 | 7.58           | 7.79           | 7.89           | 8.13           | 7.78           | 7.91           |
| Failure         | 2 (20%)        |                | 1 (10%)        |                | 0 (0%)         |                |
| <i>P</i> -value | 0.754          |                |                |                |                |                |

ECIRS, endoscopic combined intrarenal surgery.

Supplementary Table S3. Detailed data on the scope resolution evaluation

| Operation type | Ureteroscopy | Supine ECIRS | Prone ECIRS |
|----------------|--------------|--------------|-------------|
| Direction      |              |              |             |
| Pass criterion | ≥ 4 LP/mm    | ≥ 4 LP/mm    | ≥ 4 LP/mm   |
| Scopes         | 5.04         | 4.49         | 4.49        |
|                | 4.49         | 5.04         | 5.04        |
|                | 5.04         | 4.49         | 5.04        |
|                | 4.49         | 5.04         | 5.04        |
|                | 4.49         | 4.49         | 4.49        |
|                | 4.49         | 5.04         | 5.04        |
|                | 4.49         | 5.04         | 4.49        |
|                | 4.49         | 5.04         | 4.49        |
|                | 5.04         | 5.04         | 5.04        |
|                | 5.04         | 5.04         | 5.04        |
| Failure        | 0 (0%)       | 0 (0%)       | 0 (0%)      |
| P value        | 1            |              |             |

ECIRS, endoscopic combined intrarenal surgery; LP, line pairs.

Supplementary Table S4. Detailed data on the scope water flow rate evaluation

| Operation type  | Ureteroscopy | Supine ECIRS | Prone ECIRS |
|-----------------|--------------|--------------|-------------|
| Direction       |              |              |             |
| Pass criterion  | ≥ 35 mL/min  | ≥ 35 mL/min  | ≥ 35 mL/min |
| Scopes          | 34           | 36           | 42          |
|                 | 34           | 42           | 34          |
|                 | 32           | 38           | 38          |
|                 | 34           | 42           | 40          |
|                 | 26           | 42           | 42          |
|                 | 32           | 44           | 42          |
|                 | 34           | 42           | 42          |
|                 | 44           | 44           | 42          |
|                 | 34           | 44           | 44          |
|                 | 40           | 46           | 42          |
| Failure         | 7 (70%)      | 0 (0%)       | 1 (10%)     |
| <i>P</i> -value | 0.001        |              |             |

ECIRS, endoscopic combined intrarenal surgery.
